# Supplementary material
Source: ML conference proceedings conference paper supplement (https://openreview.net/forum?id=VPSDRWSoni)
Supplement: supplementary_material [file DiagramDiff_Appendix.pdf › DiagramDiff Supplementary Materials/DiagramDiff_Appendix.pdf]

## 1 APPENDIX

The organization of the supplementary material is as follows:

- Appendix A: Split-Point Detection Algorithm;
- Appendix B: Graph Building;
- Appendix C: Supported diagram element categories for recognition.
- Appendix D: The results of the user experiment questionnaire;
- Appendix E: More examples from the user study.
- Appendix F: The Use of Large Language Models (LLMs).

### A SPLIT-POINT DETECTION ALGORITHM

The split-point detection method is shown in Algorithm 1.

---

**Algorithm 1** Split-Point Detection

---

**Input:** Skeleton  $\mathcal{S}$ , joint map  $\mathcal{J}$

**Output:** Optimised split points  $\mathcal{P}^*$

```
1:  $\mathcal{P} \leftarrow \{p \in \mathcal{S} \setminus \mathcal{J} : \theta_p < \theta_{\text{thr}}(\ell_p)\}$ 
2: for each  $s \in \mathcal{P}$  do
3:    $\lambda_s \leftarrow \exp(-\beta\kappa_s)$ 
4: end for
5:  $\mathcal{E} \leftarrow \emptyset$  // initialise empty edge set
6: for each unordered pair  $(s, t) \subset \mathcal{P}$  with  $\|s - t\|_2 < r$  do
7:    $\phi_{s,t} \leftarrow \exp(-\|s - t\|_2/\sigma)$  // compute pairwise cost
8:    $\mathcal{E} \leftarrow \mathcal{E} \cup \{(s, t)\}$  // add edge to graph
9: end for
10: Build graph  $G = (\mathcal{P}, \mathcal{E})$ 
11:  $\mathbf{e}^* \leftarrow \text{GraphCut}(\{\lambda_s\}, \{\phi_{s,t}\})$ 
12:  $\mathcal{P}^* \leftarrow \{s \mid e_s^* = 1\}$ 
13: return  $\mathcal{P}^*$ 
```

---

### B GRAPH BUILDING

Each diagram is defined as a graph, denoted as  $G$ . Each diagram  $G_i$  ( $i = 1, \dots, K$ ) consists of a sequence of strokes, denoted as  $\{S_a^i \mid a = 1, \dots, n_i\}$ , where  $n_i$  represents the total number of strokes in diagram  $G_i$ . Each stroke  $S_a^i$  possesses the following attributes: a stroke class label  $C_a^i$ , which indicates the category of the stroke, and a symbol identifier  $I_a^i$ , which represents the symbol to which the stroke belongs. Therefore, each stroke  $S_a^i$  can be represented as a graph node  $N_a^i = (S_a^i, C_a^i, I_a^i)$ . For the diagram  $G_i$ , the collection of all its strokes constitutes the node set  $\{N_a^i \mid a = 1, \dots, n_i\}$ . In addition, the connections between strokes in diagram  $G_i$  form an edge set, denoted as  $\{E_b^i \mid b = 1, \dots, m_i\}$ , where  $m_i$  represents the total number of edges in diagram  $G_i$ . Each edge  $E_b^i$  represents the connection between two strokes and has an edge class label  $C_b^i$ , which distinguishes between positive edges and negative edges. A positive edge indicates that the two connected nodes belong to the same instance, while a negative edge indicates that the two connected nodes belong to different instances. Each edge  $E_b^i$  can be represented as  $E_b^i = (N_x^i, N_y^i, C_b^i)$ , where  $N_x^i$  and  $N_y^i$  denote the two endpoints of the edge. In summary, a diagram  $G_i = (V^i, E^i)$  is defined by its node set  $V^i = \{N_a^i \mid a = 1, \dots, n_i\}$  and edge set  $E^i = \{E_b^i \mid b = 1, \dots, m_i\}$ . By accurately recognizing the node categories and edge categories, stroke-level instance recognition of offline diagrams is achieved.

### C SUPPORTED DIAGRAM ELEMENT CATEGORIES FOR RECOGNITION

As shown in Table 1, our method is capable of recognizing the 20 categories of diagram elements.

## D THE RESULTS OF THE USER EXPERIMENT QUESTIONNAIRE

To further validate the practical utility of our method, we conducted a questionnaire survey among the participants. We conducted a p-value test on the questionnaire results to validate the effectiveness and statistical significance of the proposed method in question-answering and editing tasks. 90% of participants agreed that the method significantly improved the accuracy of diagram-based question-answering tasks ( $p < 0.001$ ), making responses more precise and semantically relevant. In editing tasks, 90% of participants believed the method’s significant enhancement of offline diagram reusability and its substantial improvement in editing accuracy ( $p < 0.001$ ).

| Text                                                                                | Terminal                                                                            | Rounded Rectangle                                                                   | Process                                                                             | Preparation                                                                           |
|-------------------------------------------------------------------------------------|-------------------------------------------------------------------------------------|-------------------------------------------------------------------------------------|-------------------------------------------------------------------------------------|---------------------------------------------------------------------------------------|
| <i>Best Wishes</i><br><i>DiagramMaster</i>                                          |    |    |    |    |
| Predefined Process                                                                  | Multiple Document                                                                   | Manual Operation                                                                    | Manual Input                                                                        | Extract                                                                               |
|    |    |    |    |    |
| External Data                                                                       | Ellipse                                                                             | Document                                                                            | Display                                                                             | Decision                                                                              |
|    |    |    |    |    |
| Database                                                                            | Data                                                                                | Circle                                                                              | Arrow                                                                               | Annotation                                                                            |
|  |  |  |  |  |

Table 1: Supported symbol types.

## E MORE EXAMPLES FROM THE USER STUDY

The following are the four typical types of errors that LLMs may encounter in user experiments, as shown in Fig. 1,2,3 and 4. The comparison between DiagramDiff and the results generated by LLMs is also presented.

## F THE USE OF LARGE LANGUAGE MODELS (LLMs)

We conducted user experiments using LLMs to validate the effectiveness of our method, and did not use LLMs for writing articles or other purposes

108  
109  
110  
111  
112  
113  
114  
115  
116  
117  
118  
119  
120  
121  
122  
123  
124  
125  
126  
127  
128  
129  
130  
131  
132  
133  
134  
135  
136  
137  
138  
139  
140  
141  
142  
143  
144  
145  
146  
147  
148  
149  
150  
151  
152  
153  
154  
155  
156  
157  
158  
159  
160  
161

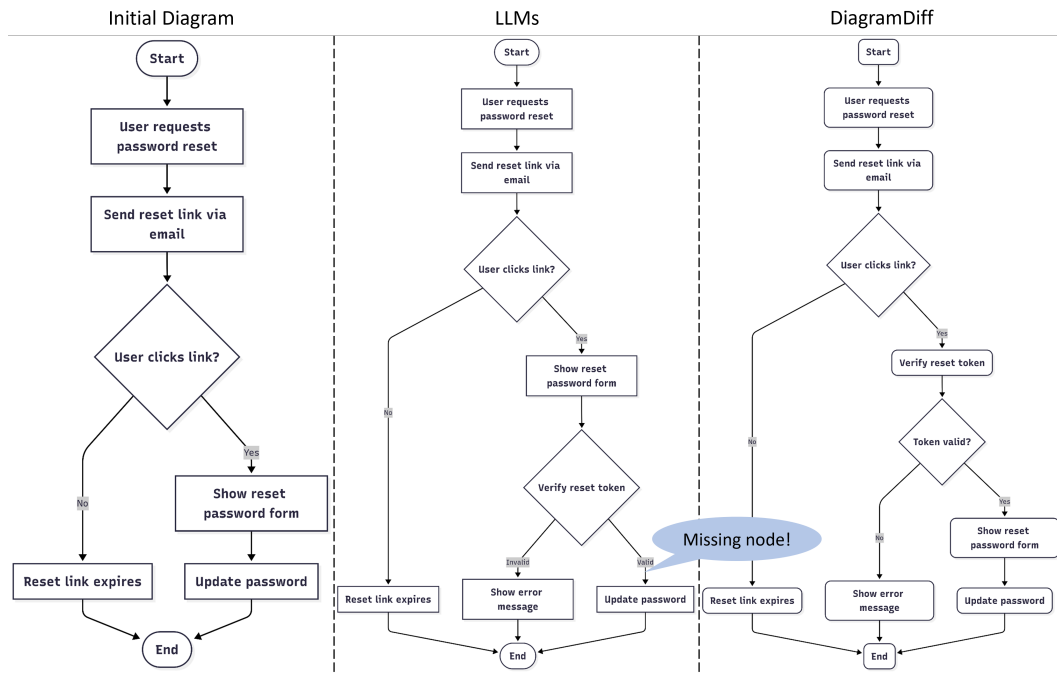

Figure 1: Order: Add a step to verify the shipping address before processing payment. If the address is invalid, notify the customer and end the process.

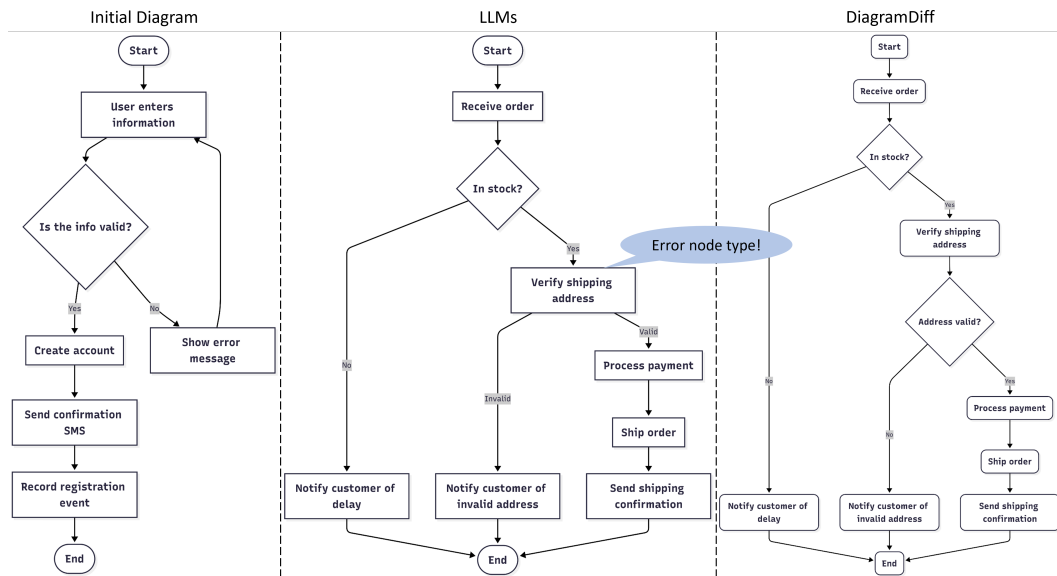

Figure 2: Order: Add a step to check if the meeting room is available after checking organizer availability. If the room is not available, propose alternative times.

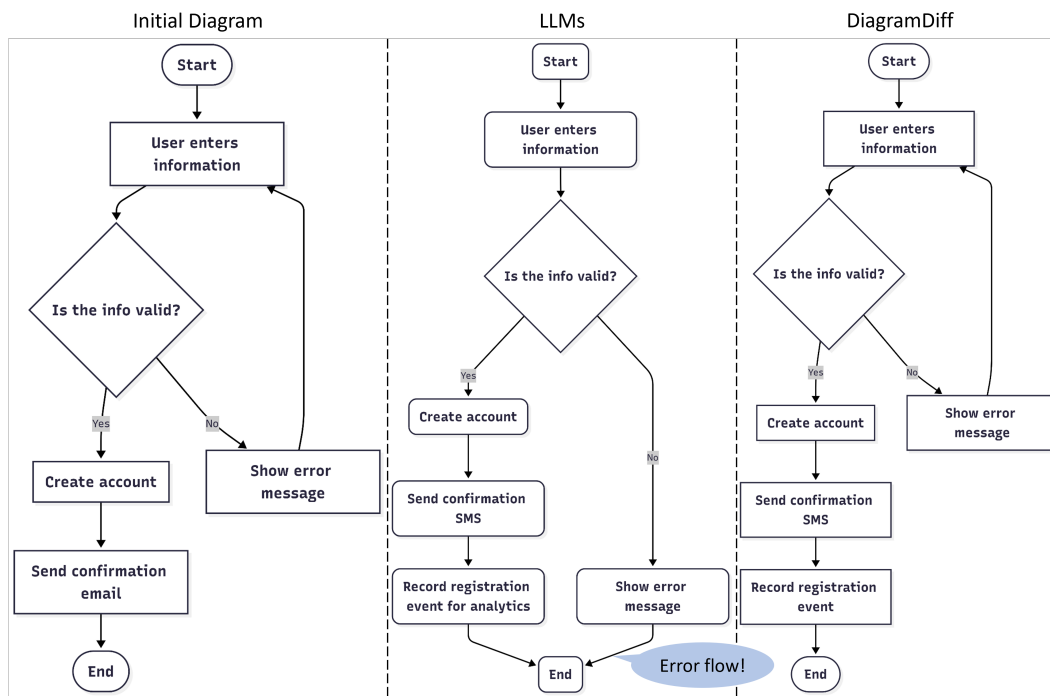

Figure 3: Order: Replace the email confirmation step with SMS confirmation, as SMS is more immediate. After sending the SMS, add a step to record the registration event for analytics.

216  
217  
218  
219  
220  
221  
222  
223  
224  
225  
226  
227  
228  
229  
230  
231  
232  
233  
234  
235  
236  
237  
238  
239  
240  
241  
242  
243  
244  
245  
246  
247  
248  
249  
250  
251  
252  
253  
254  
255  
256  
257  
258  
259  
260  
261  
262  
263  
264  
265  
266  
267  
268  
269

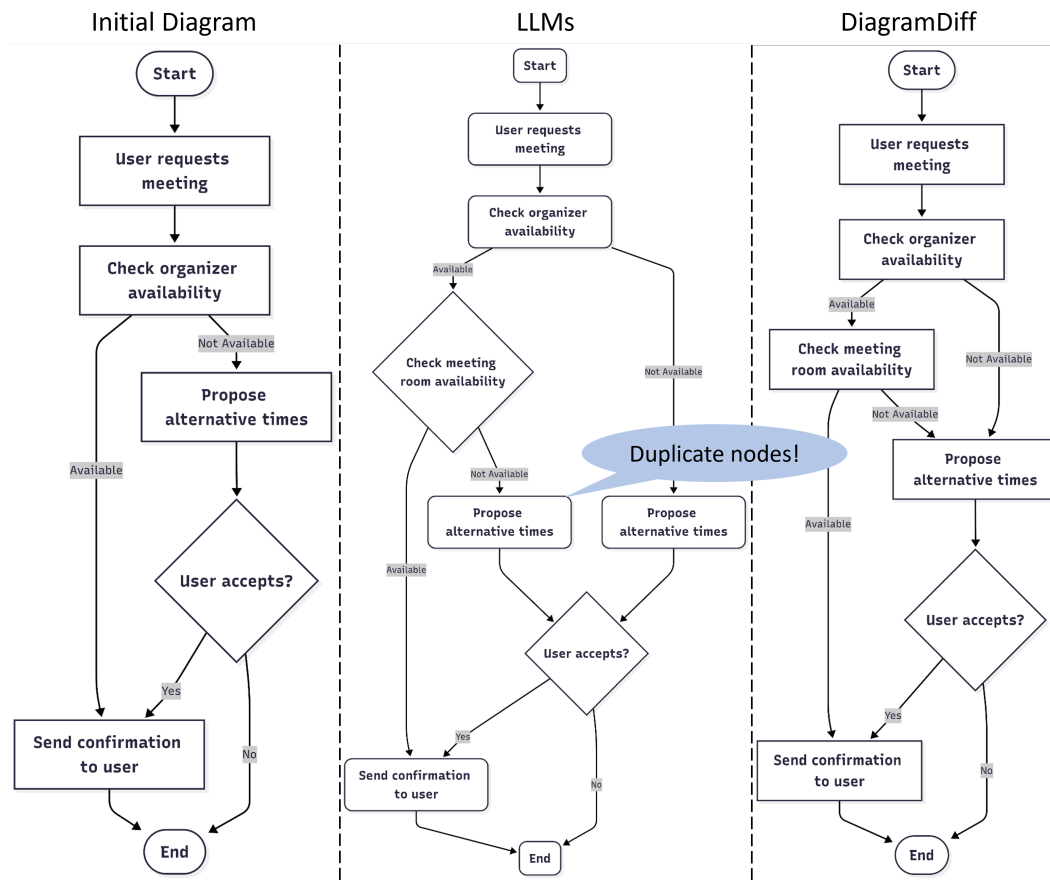

Figure 4: Order: Before updating the password, add a step to verify the reset token. If the token is invalid, show an error and end the process.
